# Supplementary material for: Ionomycin Treatment Renders NK Cells Hyporesponsive
Source: PubMed Central journal article supplement (PMC4805247; doi:10.1371/journal.pone.0150998), 2016-03-23

## Supplementary FIGURE 7

### 1.- Gene expression of human NK cells compared with other cell types [43]

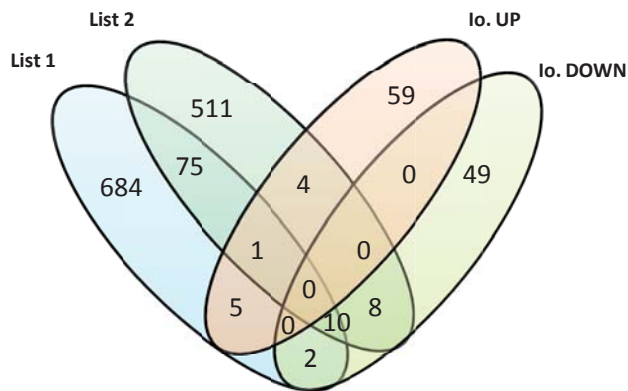

Common elements in "List 1", "List 2" and "lo. DOWN":

|        |       |
|--------|-------|
| GZMH   | ITGB2 |
| IL18R1 | CTSW  |
| PLAC8  | RGS18 |
| GNLY   | HCST  |
| ITGAM  |       |
| CD300A |       |

Common elements in "List 1" and "lo. DOWN":

GZMA  
SLAMF8

Common elements in "List 1", "List 2" and "lo. UP":

RAMP1

Common elements in "List 2" and "lo. UP":

|        |       |
|--------|-------|
| CD160  | DUSP2 |
| B3GNT7 | DUSP4 |

Common elements in "List 1" and "lo. UP":

|       |        |
|-------|--------|
| PYCR1 | TMEPA1 |
| MOXD1 | NMB    |
| GNG4  |        |

### 2.- Activated CD56<sup>dim</sup>CD16<sup>+</sup> NK vs. CD56<sup>dim</sup>CD16<sup>+</sup> NK cells [44]

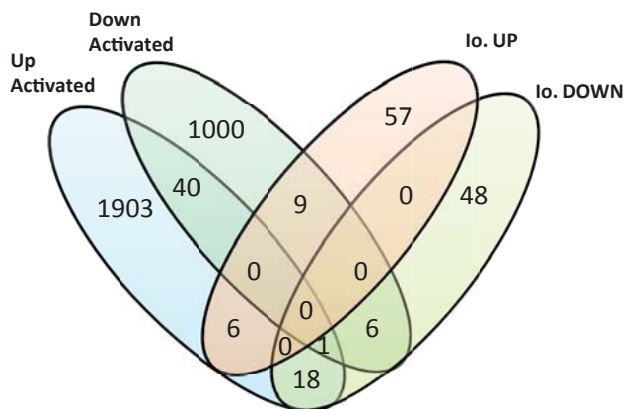

Common elements in "Up Activated" and "lo Down":

|       |           |
|-------|-----------|
| LTB   | GZMH      |
| GZMK  | RNASE6    |
| CTSW  | IRF8      |
| CD52  | CCR5      |
| MMP25 | CCR1      |
| GNLY  | ITGAM     |
| GZMA  | LTC4S     |
| XBP1  | CD300A    |
| HCST  | C10orf128 |

Common elements in "Up Activated" and "lo. UP":

|       |        |
|-------|--------|
| MAL   | CYP1B1 |
| FABP5 | PYCR1  |
| CD9   | HSPB1  |

Common elements in "Down Activated" and "lo. DOWN":

|        |       |
|--------|-------|
| NCAM1  | PCSK5 |
| GIMAP5 | PLAC8 |
| PTGDR  | STOM  |

Common elements in "Up Activated", "Down Activated" and "lo Down":

CCL3

Common elements in "Down Activated" and "lo. UP":

|        |        |
|--------|--------|
| HES6   | RNF130 |
| CD109  | RAMP1  |
| CD160  | DUSP2  |
| LAYN   | PMEPA1 |
| CTHRC1 |        |

### 3.- Tolerant murine CD8<sup>+</sup> T cells [42]

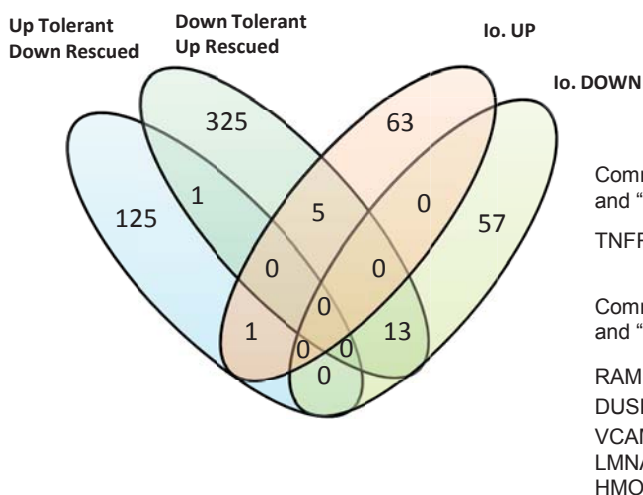

Common elements in "Up Tolerant" and "lo. UP":

TNFRSF9

Common elements in "Up Rescued" and "lo. UP":

|       |  |
|-------|--|
| RAMP1 |  |
| DUSP2 |  |
| VCAM1 |  |
| LMNA  |  |
| HMOX1 |  |

Common elements in "Up Rescued" and "lo. DOWN":

|        |
|--------|
| EGR1   |
| EGR2   |
| TNF    |
| GZMK   |
| RNASE6 |
| CCR5   |
| IL18R1 |
| CTSW   |
| NT5E   |
| PLAC8  |
| CXCR6  |
| HCST   |
| CCL4   |

4.- Murine HIV exhausted CD8<sup>+</sup> T cells

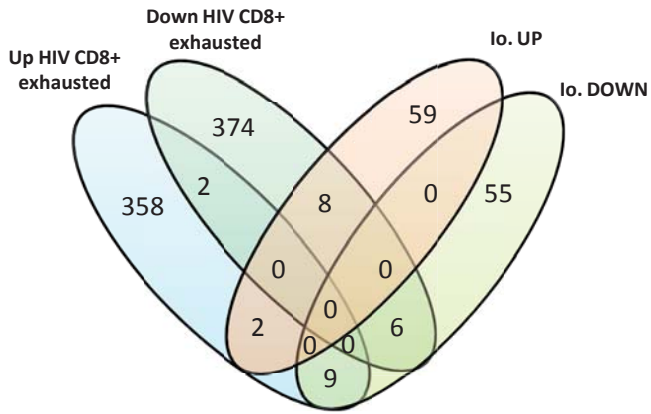

Common elements in "Up Exhausted" and "lo. UP":  
 TNFRSF9  
 IGJ

Common elements in "Up Exhausted" and "lo. DOWN":  
 IFITM1  
 STOM  
 CCL3  
 CCL3L3  
 GZMA  
 EGR1  
 CCR5  
 GZMH  
 CCR1

Common elements in "Down Exhausted" and "lo. DOWN":  
 TIMP1  
 IL18R1  
 ITGAM  
 TNF  
 SLAMF8  
 PCSK5

Common elements in "Down Exhausted" and "lo. UP":  
 CYP1B1  
 SLC7A5  
 MAL  
 LEF1  
 LMNA  
 CD9  
 NBL1  
 DUSP4

5.- Exhausted CD8<sup>+</sup> T cells from mice chronically infected with LCMVclone13 vs. effector CD8<sup>+</sup> T cells

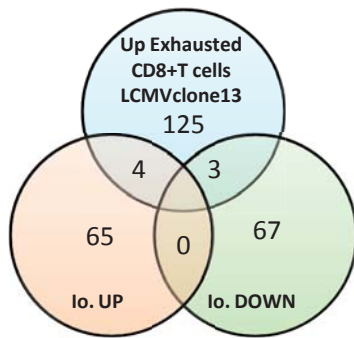

Common elements in "Up Exhausted CD8+" and "lo. UP":  
 CD160  
 TNFRSF9  
 VCAM1  
 CD9

Common elements in "Up Exhausted CD8+" and "lo. DOWN":  
 ITGB2  
 CCR2  
 EGR2

6.- Ionomycin induced anergic CD4<sup>+</sup> T cells

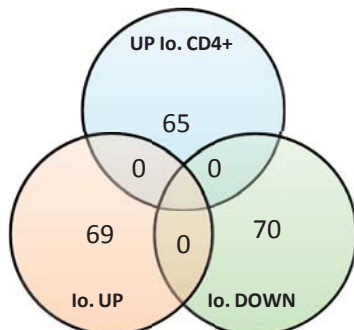

Supplement: pone.0150998.s008.pdf [file pone.0150998.s008.pdf]
