# Supplementary material for: Ionomycin Treatment Renders NK Cells Hyporesponsive
Source: PubMed Central journal article supplement (PMC4805247; doi:10.1371/journal.pone.0150998), 2016-03-23
Supplement: pone.0150998.s001.pdf [file pone.0150998.s001.pdf]

## Supporting materials and methods.

### Antibodies

Antibodies clones used for flow cytometry and, confocal microscopy are: CD2-APC (LT2, Immunotools), CD9 (MEM-192, a kind gift of Dr V.Horejsi, Institute Molecular Genetics AS AR), CD11a (HI111, BioLegend, AB\_314151), CD11a open (NK1-L16, kindly provided by C.G. Figdor, Nijmegen Center for Molecular Life Sciences), CD11a-CD18 (Ab24, Abcam, ), CD11b (ICRF44, BioLegend, AB\_314154), CD11b activated (CBRM1/5, Biolegend, AB\_314166), CD11c-APC (BU15, Immunotools, AB\_1279066), CD16 (B73.1 (a kind gift of J.L. Strominger, Harvard University), CD18 (LIA3/2 ascites, a kind gift of F. Sánchez-Madrid, H. La Princesa), CD25-FITC (HI25a, Immunotools, AB\_1071798), CD27-PE (LT27, Immunotools), CD28 (CD28.2, BD Pharmingen, AB\_396068), CD29-FITC (MEM-101A, Immunotools, AB\_1056084), CD44-APC (MEM-85, Immunotools, AB\_522565), CD45-FITC (MEM-28, Immunotools, AB\_1144367), CD49d-FITC (BU49, Immunotools, AB\_960490), CD53-FITC (HI29, Immunotools, AB\_1083941), CD54-FITC (1H4, Immunotools, AB\_1056464), CD56 unlabelled / PE (MEM-188, BioLegend, AB\_314444 / AB\_314447), CD58-PE (MEM-63, Immunotools, AB\_300983), CD59-APC (MEM-43, Immunotools, AB\_1052192), CD61-FITC (C17, Immunotools, AB\_2128768), CD62L-APC (LT-TD180, Immunotools, ), CD69 (FN50, BD Pharmingen, AB\_395914), CD85j (GHI/75, BD Pharmingen, AB\_394020), CD94-PE (HP-3D9, BD Pharmingen, AB\_396201), CD95 (IM2387, Immunotech, AB\_131702), CD107a-APC (H4A3, BioLegend, AB\_1279055), CD152-PE (BN13, Immunotech, AB\_131390), CD158a (EB6, Immunotech, ), CD158b (GL183, Serotec, AB\_2265256), CD158e1 (DX9, BD Pharmingen, AB\_396258), DNAM1 (MAB666,

R&D, AB\_2072624), HLA-ABC-PE (W6/32, Immunotools, AB\_964521), HLA-DR-PE (LT-DR, Immunotools), IFN- $\gamma$ -PE (4S.B3, BioLegend, AB\_2123323), Mouse IgG1 (MOPC-21, Sigma, AB\_1163685), NKG2D (MAB139, R&D, AB\_2133263), NKp30 (210845, R&D, AB\_2149446), NKp46 (195314, R&D, AB\_2149153), Perforin (dG9, BioLegend, AB\_314699), Pericentrin (4488, Abcam, AB\_304461), PD1 (EH12.2H7, BioLegend, AB\_940485),  $\beta$ -actin (AC-15, Sigma, AB\_476692).

Monoclonal antibodies used to stimulate the different NK cell receptors, either individually or in combination, were 2B4 (2-69, B&D Pharmingen, AB\_393899, Nakajima et al, “Activating interactions in human NK cell recognition: the role of 2B4-CD48. Eur J Immunol.” 1999 29:1676-83) CD16 (B73.1, Perussia et al, “Human natural killer cells analyzed by B73.1, a monoclonal antibody blocking Fc receptor functions. II. Studies of B73.1 antibody-antigen interaction on the lymphocyte membrane.” J Immunol. 1983 130:2142-8, a kind gift of J.L. Strominger, Harvard University), NKG2D (MAB139 R&D), NKp30 (210845, R&D), NKp46 (195314, R&D), and Mouse IgG1 (MOPC-21, Sigma) as a negative control.

## Primers used for qPCR

| GENE          | Forward primer             | Reverse primer               |
|---------------|----------------------------|------------------------------|
| <i>dap10</i>  | 5'- GCACTTCAGGCTCTTGTTT    | 5'- GCCTGGCATGTTGATGTAGA     |
| <i>itgb2</i>  | 5'- CAAGCTGGCTGAAAACAACA   | 5'- ATTGCTGCAGAAGGAGTCGT     |
| <i>itgam</i>  | 5'- GCCGGTGAAATATGCTGTCT   | 5'- GCGGTCCCATATGACAGTCT     |
| <i>myom2</i>  | 5'- GAACCCCAACAATTCCTCTGA  | 5'- TCGATCCATCACCATCTCAA     |
| <i>gzmh</i>   | 5'- CAGAAGGACTGCCAGTGTGA   | 5'- ACTCCTGGAGGTGTCCCTTT     |
| <i>cd300a</i> | 5'- GTCCTGCAAACCTCAGCTTC   | 5'- CCCACTGCAAACAGGGTAGT     |
| <i>il18r1</i> | 5'- TAGTGCCTGGAGGAGCTGTT   | 5'- ATTGGGGCAAGAATGTGAAG     |
| <i>egr1</i>   | 5'- TGACCGCAGAGTCTTTTCT    | 5'- TGGGTTGGTCATGCTCACTA     |
| <i>ncr3</i>   | 5'- CCTGAGATTCGTACCCTGGA   | 5'- GAAACGGGAAGAAGCAAGTG     |
| <i>ctsw</i>   | 5'- CCACCCCAAGAAGTACCAGA   | 5'- GTGGCCTTGATCACACCTTT     |
| <i>sell</i>   | 5'- AAACCCATGAACTGGCAAAG   | 5'- CGCAGTCCTCCTTGTTCTTC     |
| <i>matk</i>   | 5'- TACCGCGTCAAGCACACACCAG | 5'- CACTCTCCACTCTCTCGGTCTCTG |
| <i>cd56</i>   | 5'- TATTTGCCTATCCCAGTGCC   | 5'- CATACTTCTTCACCAACTGCTC   |
| <i>gnly</i>   | 5'- TCTCTCGTCTGAGCCC       | 5'- GCAGCATTGGAAACT          |
| <i>id2</i>    | 5'- CGGATATCAGCATCCTGTCC   | 5'- TCATGAACACCGCTTATTCAG    |
| <i>18s</i>    | 5'- GGGACTTAATCAACGCAAGC   | 5'- GCAATTCCCCATGAACG        |
