# Supplementary material for: Ionomycin Treatment Renders NK Cells Hyporesponsive
Source: PubMed Central journal article supplement (PMC4805247; doi:10.1371/journal.pone.0150998), 2016-03-23

SUPPLEMENTARY FIGURE 6

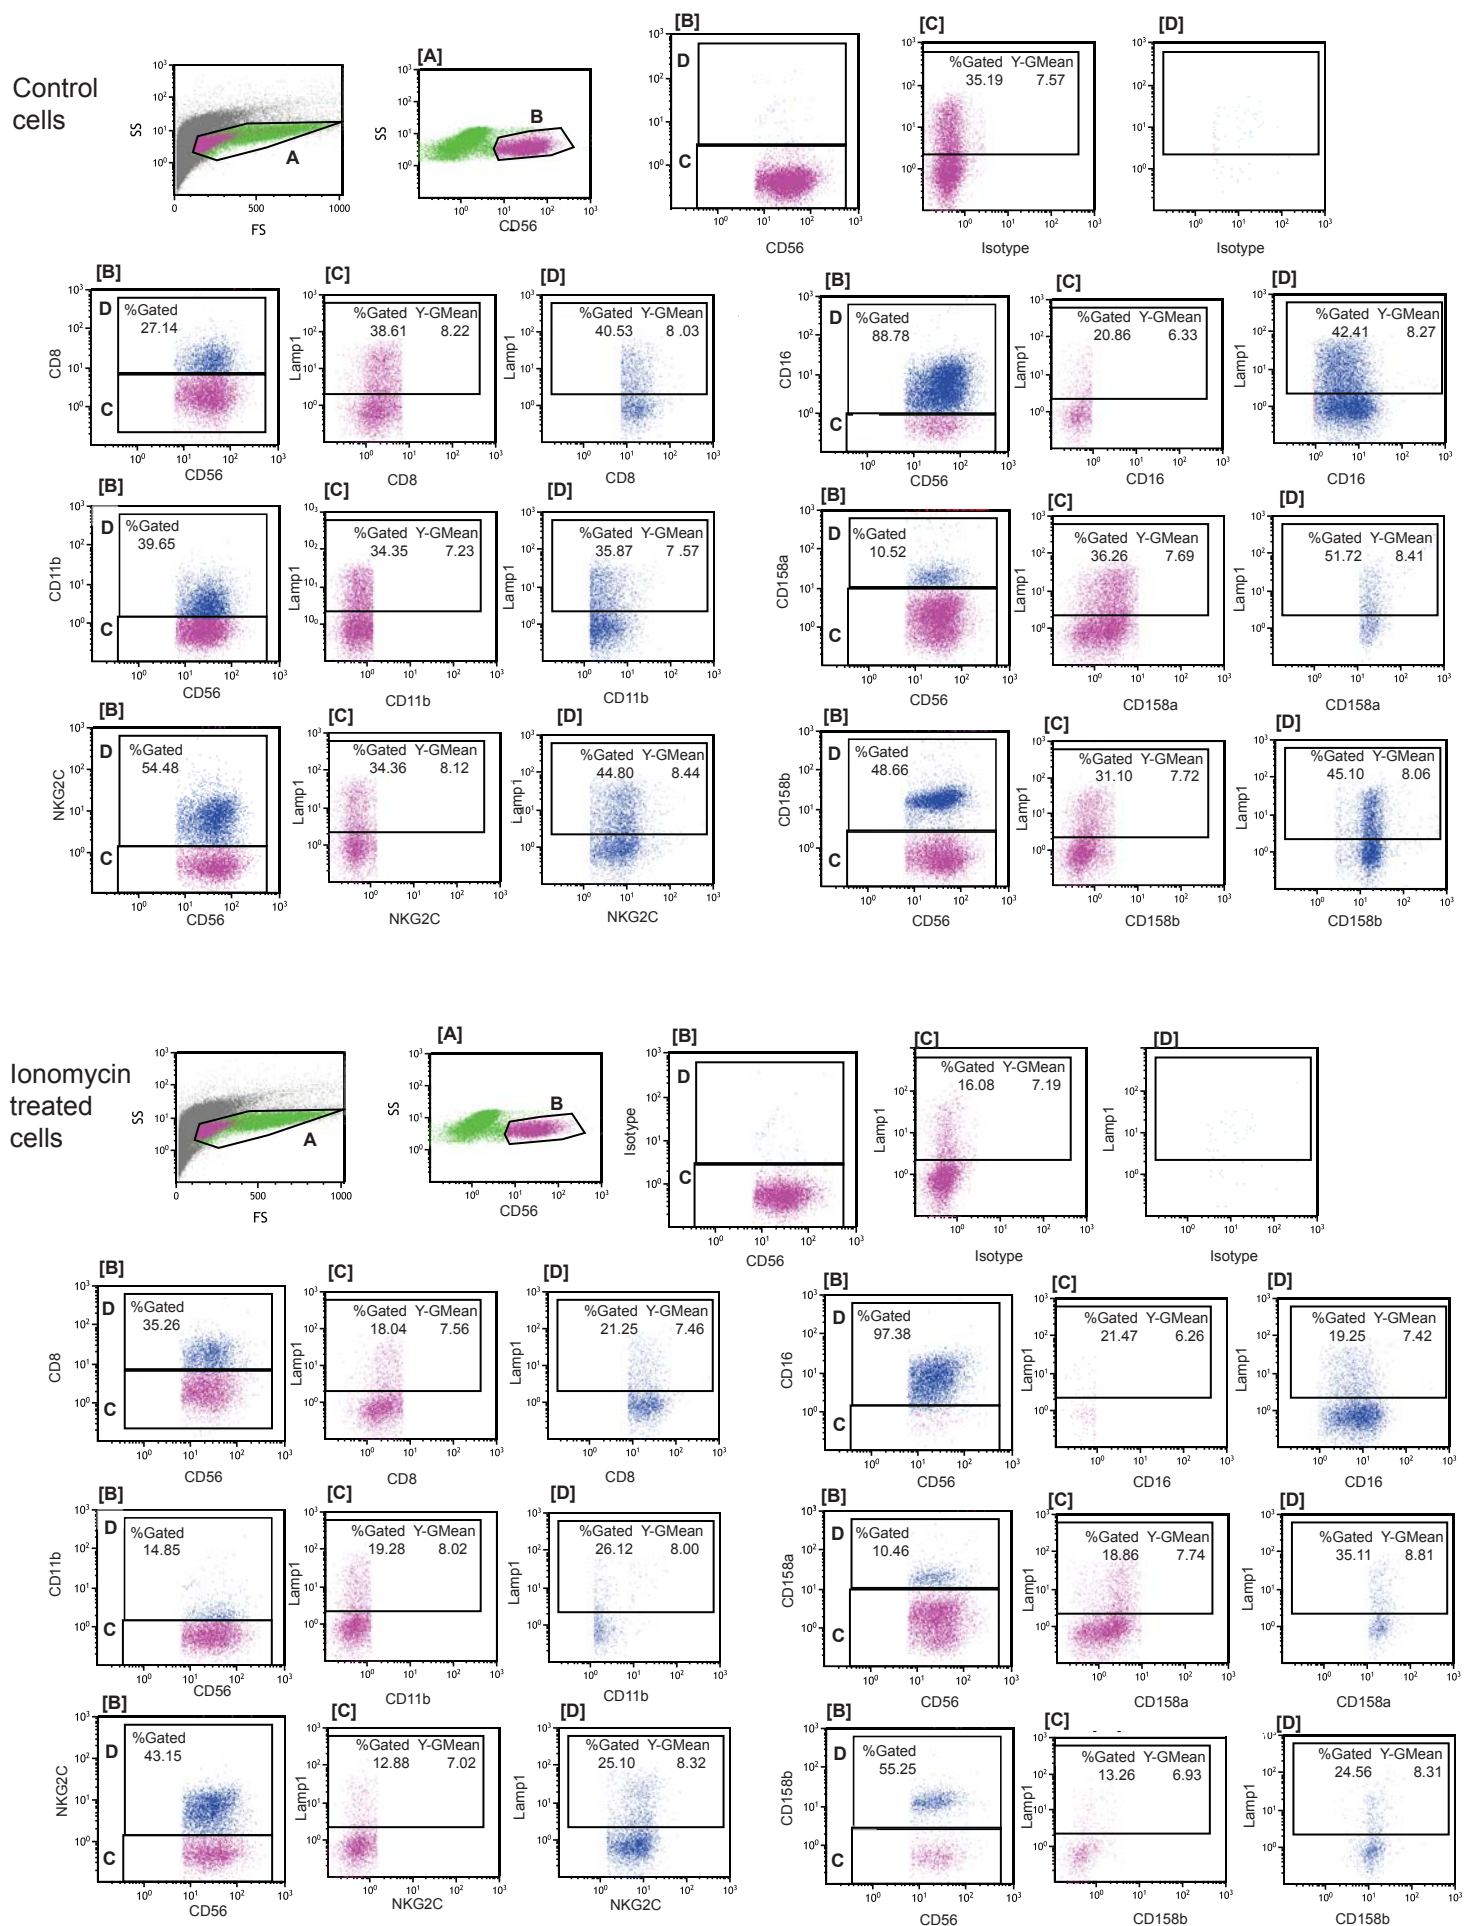

Supplement: pone.0150998.s007.pdf [file pone.0150998.s007.pdf]
