# Supplementary material for: Ionomycin Treatment Renders NK Cells Hyporesponsive
Source: PubMed Central journal article supplement (PMC4805247; doi:10.1371/journal.pone.0150998), 2016-03-23

Supplementary Figure 8

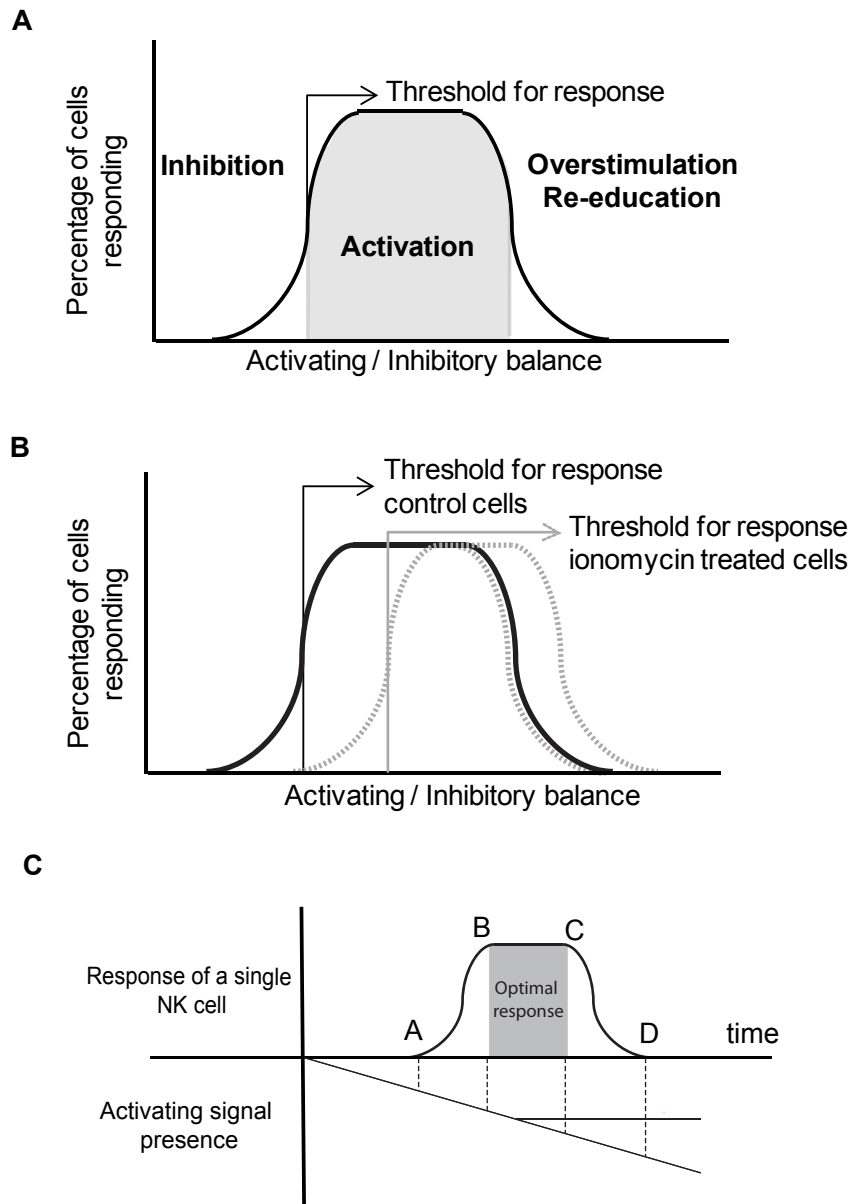

Supplement: pone.0150998.s009.pdf [file pone.0150998.s009.pdf]
