# Supplementary material for: Ionomycin Treatment Renders NK Cells Hyporesponsive
Source: PubMed Central journal article supplement (PMC4805247; doi:10.1371/journal.pone.0150998), 2016-03-23
Supplement: pone.0150998.s010.pdf [file pone.0150998.s010.pdf]

SUPPLEMENTARY TABLE 1

| Fold Change | Gene Name       | Fold Change | Gene Name        | Fold Change | Gene Name              |
|-------------|-----------------|-------------|------------------|-------------|------------------------|
| 12,44       | <b>CTHRC1</b>   | 3,34        | <b>VCAM1</b>     | 2,56        | <b>MAGEF1</b>          |
| 11,08       | <b>PLS3</b>     | 3,28        | <b>FABP5</b>     | 2,53        | <b>BMF</b>             |
| 9,1         | <b>KIAA1324</b> | 3,26        | <b>LMNA</b>      | 2,52        | <b>HOXB6</b>           |
| 7,24        | <b>CD27</b>     | 3,24        | <b>FLVCR2</b>    | 2,49        | <b>SLC7A5</b>          |
| 5,61        | <b>PON3</b>     | 3,23        | <b>B3GNT7</b>    | 2,49        | <b>PPAP2A</b>          |
| 5,32        | <b>CD9</b>      | 3,22        | <b>PLAU</b>      | 2,48        | <b>CERCAM</b>          |
| 5,02        | <b>EPAS1</b>    | 3,19        | <b>ZBED2</b>     | 2,44        | <b>PTPRF</b>           |
| 4,66        | <b>CAV1</b>     | 3,11        | <b>RNF130</b>    | 2,41        | <b>DUSP4</b>           |
| 4,45        | <b>C7orf57</b>  | 3,05        | <b>CBFA2T3</b>   | 2,41        | <b>NBL1</b>            |
| 4,27        | <b>TNFRSF9</b>  | 2,94        | <b>HSPB1</b>     | 2,4         | <b>LEF1</b>            |
| 4,21        | <b>GNG4</b>     | 2,92        | <b>MAL</b>       | 2,39        | <b>RAMP1</b>           |
| 4,2         | <b>NUAK1</b>    | 2,9         | <b>MOXD1</b>     | 2,34        | <b>PRKCDBP</b>         |
| 4,15        | <b>NMB</b>      | 2,89        | <b>RDH10</b>     | 2,27        | <b>TUBB2A</b>          |
| 4,01        | <b>IGJ</b>      | 2,87        | <b>LAYN</b>      | 2,25        | <b>PRKCE</b>           |
| 3,97        | <b>CYP1B1</b>   | 2,75        | <b>TOP1MT</b>    | 2,25        | <b>LRRC28</b>          |
| 3,94        | <b>HMOX1</b>    | 2,72        | <b>DUSP2</b>     | 5,17        | <b>A_23_P317056</b>    |
| 3,69        | <b>REEP2</b>    | 2,71        | <b>UCHL1</b>     | 3,57        | <b>LRRC16B</b>         |
| 3,53        | <b>P2RX5</b>    | 2,64        | <b>PYCR1</b>     | 2,8         | <b>A_23_P431853</b>    |
| 3,5         | <b>ITGB5</b>    | 2,62        | <b>IGFBP2</b>    | 2,69        | <b>PMEPA1</b>          |
| 3,5         | <b>P2RX5</b>    | 2,62        | <b>PMCH</b>      | 2,6         | <b>A_24_P272515</b>    |
| 3,47        | <b>HPSE</b>     | 2,59        | <b>TMEM117</b>   | 2,6         | <b>CR591103</b>        |
| 3,45        | <b>CD160</b>    | 2,59        | <b>CD109</b>     | 2,56        | <b>A_33_P3253832</b>   |
| 3,41        | <b>HES6</b>     | 2,58        | <b>DMRT1</b>     | 2,3         | <b>LOC100008589</b>    |
| 3,39        | <b>CREB3L3</b>  | 2,57        | <b>COL6A1</b>    | 1,56        | <b>A_24_P307384</b>    |
|             |                 |             |                  |             |                        |
| Fold Change | Gene Name       | Fold Change | Gene Name        | Fold Change | Gene Name              |
| -4,81       | <b>CD300C</b>   | -2,81       | <b>RNASE6</b>    | -2,35       | <b>PLAC8</b>           |
| -4,69       | <b>ZNF683</b>   | -2,8        | <b>NCF2</b>      | -2,34       | <b>TIMP1</b>           |
| -4,64       | <b>EGR1</b>     | -2,77       | <b>RGS18</b>     | -2,3        | <b>NT5E</b>            |
| -4,6        | <b>CCL3L3</b>   | -2,76       | <b>ITGAM</b>     | -2,27       | <b>ITGA6</b>           |
| -4,46       | <b>CCR2</b>     | -2,74       | <b>LTC4S</b>     | -2,27       | <b>APOBEC3H</b>        |
| -4,29       | <b>IRF8</b>     | -2,74       | <b>MYOM2</b>     | -2,27       | <b>NCR3</b>            |
| -4,24       | <b>CD300A</b>   | -2,74       | <b>HCST</b>      | -2,24       | <b>SLAMF8</b>          |
| -4,03       | <b>SELL</b>     | -2,71       | <b>PACSIN1</b>   | -2,23       | <b>STOM</b>            |
| -3,95       | <b>HS3ST3B1</b> | -2,68       | <b>CCR1</b>      | -2,23       | <b>IL18R1</b>          |
| -3,82       | <b>MATK</b>     | -2,67       | <b>GZMH</b>      | -2,21       | <b>PCSK5</b>           |
| -3,62       | <b>CCL3</b>     | -2,67       | <b>NCAM1</b>     | -2,2        | <b>CPNE7</b>           |
| -3,49       | <b>CCL4</b>     | -2,67       | <b>CXCR6</b>     | -2,2        | <b>MMP25</b>           |
| -3,46       | <b>CCL4L1</b>   | -2,65       | <b>CCR5</b>      | -2,17       | <b>GIMAP5</b>          |
| -3,4        | <b>XBP1</b>     | -2,63       | <b>LTB</b>       | -3,71       | <b>A_33_P3397473</b>   |
| -3,36       | <b>PTGDR</b>    | -2,63       | <b>SPRY2</b>     | -4,49       | <b>ENST00000390595</b> |
| -3,3        | <b>STYK1</b>    | -2,57       | <b>SNCA</b>      | -4,25       | <b>ENST00000390605</b> |
| -3,25       | <b>GZMK</b>     | -2,53       | <b>ADRB2</b>     | -4,45       | <b>ENST00000390622</b> |
| -3,1        | <b>TNF</b>      | -2,53       | <b>IL3RA</b>     | -2,72       | <b>ENST00000400702</b> |
| -3,07       | <b>ITGB2</b>    | -2,47       | <b>CCR3</b>      | -4,61       | <b>ENST00000443661</b> |
| -3          | <b>CCDC65</b>   | -2,47       | <b>C20orf197</b> | -2,22       | <b>IFITM1</b>          |
| -2,98       | <b>CTSW</b>     | -2,46       | <b>CMKLR1</b>    | -4,48       | <b>LOC100133862</b>    |
| -2,98       | <b>GZMA</b>     | -2,46       | <b>TSPAN32</b>   | -3,18       | <b>LOC100290415</b>    |
| -2,97       | <b>GNLY</b>     | -2,4        | <b>CXCR7</b>     | -2,97       | <b>LOC100292999</b>    |
| -2,94       | <b>EGR2</b>     | -2,38       | <b>C10orf128</b> | -2,65       | <b>RGL4</b>            |
| -2,81       | <b>CD52</b>     | -2,35       | <b>GPD1L</b>     | -2,44       | <b>UNQ6228</b>         |
