# Supplementary material for: Ionomycin Treatment Renders NK Cells Hyporesponsive
Source: PubMed Central journal article supplement (PMC4805247; doi:10.1371/journal.pone.0150998), 2016-03-23
Supplement: pone.0150998.s011.pdf [file pone.0150998.s011.pdf]

SUPPLEMENTARY TABLE 2

|                                                             |                                                                                     |                                                                                                                                          |
|-------------------------------------------------------------|-------------------------------------------------------------------------------------|------------------------------------------------------------------------------------------------------------------------------------------|
| Ionomycin downregulated genes                               | <b>ENRICHED PATHWAYS</b>                                                            |                                                                                                                                          |
|                                                             | <b>defense responses</b> (GO:0006952)                                               | <i>gimap5, mmp25, il18r1, ncr3, nt5e, ccr3, il3ra, adrb2, snca, ccr5, ccr1, ncf2, rnase6, gnly, itgb2, tnf, ccl4l1, ccl4, ccl3, ccr2</i> |
|                                                             | <b>inflammatory response</b> (GO:0006954)                                           | <i>mmp25, ncr3, nt5e, ccr3, il3ra, adrb2, ccr5, ccr1, itgb2, tnf, ccl4l1, ccl4, ccl3, ccr2</i>                                           |
|                                                             | <b>regulation of immune system process</b> (GO:0002682)                             | <i>egr1, gimap5, ncr3, snca, tnf</i>                                                                                                     |
|                                                             | <b>innate immune response</b> (GO:0045087)                                          | <i>ncam1, ltb, adrb2, tnf</i>                                                                                                            |
|                                                             | <b>chemotaxis</b> (GO:0006935)                                                      | <i>ccr2, ccl3, ccl4, ccl4l1, itgb2, itgam, ccr1, ccr5, ccr3, cmklr1</i>                                                                  |
|                                                             | <b>locomotory behavior</b> (GO:0007626)                                             | <i>cmklr1, itgam, ccr3, snca, ccr5, ccr1, itgb2, ccl4l1, ccl4, ccl3, ccr2</i>                                                            |
|                                                             | <b>cellular calcium ion homeostasis</b> (GO:0006874)                                | <i>ccr2, ccl3, cd52, ccr1, ccr5, ccr3</i>                                                                                                |
|                                                             | <b>cell-cell signaling</b> (GO:0007267)                                             | <i>pcsk5, tspan32, spry2, egr2, ltb, egr1, snca, ccr5, ccr1, itgb2, tnf, ccl4, ccl3</i>                                                  |
|                                                             | <b>cell adhesion</b> (GO:0007155)                                                   | <i>itga6, cd300a, sell, ncam1, itgam, ccr3, ccr1, itgb2, tnf, ccl4</i>                                                                   |
|                                                             | <b>integrin-mediated signaling pathway</b> (GO:0007229)                             | <i>ncam1, ltb, adrb2, tnf</i>                                                                                                            |
|                                                             | <b>cell activation</b> (GO:0001775)                                                 | <i>ltb, itgam, egr1, gimap5, snca, tnf</i>                                                                                               |
|                                                             | <b>leukocyte activation</b> (GO:0045321)                                            | <i>itgam, egr1, gimap5, snca</i>                                                                                                         |
|                                                             | <b>immunesystem development</b> (GO:0002520)                                        | <i>timp1, irf3, ltb, egr1, gimap5, tnf</i>                                                                                               |
|                                                             | <b>regulation of cell proliferation</b> (GO:0042127)                                | <i>ifitm1, timp1, ltb, adrb2, tnf</i>                                                                                                    |
|                                                             | <b>cytokine production</b> (GO:0001816)                                             | <i>pcsk5, ltb, gimap5, tnf</i>                                                                                                           |
|                                                             | <b>positive regulation of signal transduction</b> (GO:0009967)                      | <i>ncam1, ltb, adrb2, tnf</i>                                                                                                            |
|                                                             | <b>positive regulation of programmed cell death</b> (GO:0043067)                    | <i>ncam1, ltb, adrb2, tnf</i>                                                                                                            |
|                                                             | <b>ENRICHED CELLULAR LOCALIZATIONS</b>                                              |                                                                                                                                          |
|                                                             | <b>cell surface</b> (GO:0009986)                                                    | <i>ITGA6, ccr5, ncam1, itgam, sell, tnf, mmp25</i>                                                                                       |
|                                                             | <b>membrane rafts</b> (GO:0045121)                                                  | <i>stom, adrb2, tnf</i>                                                                                                                  |
|                                                             | <b>extracellular space</b> (GO:0005615)                                             | <i>ltb, gnly, tnf, ccl4l1, ccl4, ccl3, ccl3l3, pcsk5</i>                                                                                 |
|                                                             | <b>ENRICHED FUNCTIONS</b>                                                           |                                                                                                                                          |
|                                                             | <b>cytokine activity</b> (GO:0005125)                                               | <i>ltb, tnf, ENST00000400702, ccl4l1, ccl4, ccl3, ccl3l3</i>                                                                             |
|                                                             | <b>cytokine binding</b> (GO:0019955)                                                | <i>il18r1, il3ra, ncam1, cxcr7, cmklr1, ccr3, ccr5, cxcr6, ccr1, ccr2</i>                                                                |
|                                                             | <b>peptidase activity</b> (GO:0008233)                                              | <i>mmp25, gzmh, ctsw, gzmk, gzma, pcsk5</i>                                                                                              |
|                                                             | <b>cell death</b> (GO:0008219)                                                      | <i>ltb, gzmh, gzma, itgb2, tnf</i>                                                                                                       |
| <b>natural killer cell mediated cytotoxicity</b> (hsa04650) | <i>ncr3, hcst, itgb2, tnf</i>                                                       |                                                                                                                                          |
| <b>cytokine-cytokine receptor interaction</b> (hsa04060)    | <i>il18r1, il3ra, ltb, ccr5, cxcr6, ccr1, tnf, ccl4l1, ccl4, ccl3, ccr2, ccl3l3</i> |                                                                                                                                          |
| <b>leukocyte transendothelial migration</b> (hsa04670)      | <i>nf2, itgam, itgb2</i>                                                            |                                                                                                                                          |
| Ionomycin upregulated genes                                 | <b>ENRICHED PATHWAYS</b>                                                            |                                                                                                                                          |
|                                                             | <b>response to organic substance</b> (GO:0010033)                                   | <i>creb3l3, cyp1b1, lef1, ptprf, igfbp2, gng4, dusp4, cd27, cav1, hspb1, hmox1</i>                                                       |
|                                                             | <b>regulation of signal transduction</b> (GO:0009966)                               | <i>lef1, ptprf, igfbp2, p2rx5, gng4, ramp1, dusp2, cd27, cav1, hmox1</i>                                                                 |
|                                                             | <b>positiveregulation of signal transduction</b> (GO:0009967)                       | <i>p2rx5, cd27, cav1, hmox1</i>                                                                                                          |
|                                                             | <b>positive regulation of programmed cell death</b> (GO_0043068)                    | <i>ptprf, prkce, mal, tnfrsf9, cd27, hmox1</i>                                                                                           |
|                                                             | <b>dephosphorylation</b> (GO:0016311)                                               | <i>ptprf, prkce, mal, tnfrsf9, cd27, hmox1</i>                                                                                           |
|                                                             | <b>cellular ion homeostasis</b> (GO:0006873)                                        | <i>pmch, p2rx5, mal, cav1</i>                                                                                                            |
|                                                             | <b>ENRICHED CELLULAR LOCALIZATIONS</b>                                              |                                                                                                                                          |
|                                                             | <b>insoluble fraction</b> (GO:0005626)                                              | <i>hspb1, lmna, prkce, ptprf, ppap2a, rdh10, mal, hmox1, cyp1b1, cav1, pon3, cd27</i>                                                    |
|                                                             | <b>extracellular space</b> (GO:0005615)                                             | <i>ramp1, cd109, pmch, igfbp2, vcam1, hmox1, pon3</i>                                                                                    |
|                                                             | <b>vesicular fraction</b> (GO:0042598)                                              | <i>ptprf, rdh10, hmox1, cyp1b1, pon3</i>                                                                                                 |
|                                                             | <b>ENRICHED FUNCTIONS</b>                                                           |                                                                                                                                          |
|                                                             | <b>phosphatases</b> (GO:0016791)                                                    | <i>dusp4, ptprf, ppap2a, dusp2, pon3</i>                                                                                                 |
| <b>oxidoreductases</b> (GO:0016491)                         | <i>a_23_p431853, a_23_p317056, igfbp2, pycr1, rdh10, moxd1, cyp1b1, hmox1</i>       |                                                                                                                                          |
